# Supplementary material for: miR-1207-5p Can Contribute to Dysregulation of Inflammatory Response in COVID-19 via Targeting SARS-CoV-2 RNA
Source: Front Cell Infect Microbiol. 2020 Oct 29;10:586592. doi: 10.3389/fcimb.2020.586592 (PMC7658538; doi:10.3389/fcimb.2020.586592)
Supplement: Supplementary file 2 [file Table_2.xlsx]

## Sheet: Foglio1
Table S2: Publicly available datasets used in the study. Column B summarizes the data analysis results, specifics for the CSF1 mRNA. The cell is highlighted in green if CSF1 is overexpressed, in red if it is not overexpressed. The next columns contain: C) the source of the dataset, D) the reference describing the dataset, E) the type of experiment, F) the experimental platform type, G) the cell t…
DE analysis ID	Is CSF1 upregulated? (FC/pvalue)	Data source	Reference	Type	Platform	Tissue	Samples (Treatment/Control)	External Analysis	Data analysis
1	log2FC = 0.89 padj = 5 10^-22	GSE147507	Blanco-Melo et al (26)	In vitro infection	Illumina/RNA-seq	A549 cells	SARS-CoV-2 treated (3) / MOCK (3)		We considered the raw read counts of wild type A549 (Series 5 of the GSE147507 dataset). DEseq2 R library was used to compare SARS-CoV-2 vs MOCK infected samples' gene expression profiles.
2	log2FC = 1.54 padj = 4 10^-16	GSE147507	Blanco-Melo et al (26)	In vitro infection	Illumina/RNA-seq	ACE2 Expressing A549 cells	SARS-CoV-2 treated (3) / MOCK (3)		We considered the raw read counts of ACE2 expressing A549 cells (Series 6 of the GSE147507 dataset). DEseq2 R library was used to compare SARS-CoV-2 vs MOCK infected samples' gene expression profiles.
3	log2FC = 2.53 padj = 3 10^-49	GSE147507	Blanco-Melo et al (26)	In vitro infection	Illumina/RNA-seq	Calu3 cells	SARS-CoV-2 treated (3) /MOCK (3)		We considered the raw read counts of wild type Calu3 cells (Series 7 of the GSE147507 dataset). DEseq2 R library was used to compare SARS-CoV-2 vs MOCK infected samples' gene expression profiles.
4	log2FC = 1.56 padj = 6 10^-41	GSE147507	Blanco-Melo et al (26)	In vitro infection	Illumina/RNA-seq	ACE2 Expressing A549 cells	SARS-CoV-2 treated (3) /MOCK (3)		We considered the raw read counts of ACE2 expressing A549 cells (Series 16 of the GSE147507 dataset). DEseq2 R library was used to compare SARS-CoV-2 vs MOCK infected samples' gene expression profiles.
5	log2FC = 1.07 padj = 0.0008	PRJNA615032	Blanco-Melo et al (26), Vishnubalaji et al (33)	In vitro infection	Illumina/RNA-seq	NHBE cells	SARS-CoV-2 treated (3) /MOCK (3)	Table S2 from (33).
6	Not overexpressed	PRJNA615032	Blanco-Melo et al (26), Vishnubalaji et al (33)	Human samples	Illumina/RNA-seq	Lung biopsies	CoviD-19 (2) /Healthy (2)	Table S8 from (33).
7	Not overexpressed	HRA000143	Zhou et al (34)	Human samples	Illumina/RNA-seq	BALF	CoviD-19 (8) / Healthy (20)	Table S3 from (34).
8	log2FC = -1.36 pval = 0.2	CRA002390	Xiong et al (35)	Human samples	MGI and Illumina/RNA-seq	PBMC	CoviD-19 (3) / Healthy (3)	Suppl. File 1 from (35)
9	Not overexpressed	CRA002390	Xiong et al (35)	Human samples	MGI and Illumina/RNA-seq	BALF	CoviD-19 (2) / Healthy (3)	Suppl. File 1 from (35)
10	log2FC = -0.17 pval = 0.08	E-MTAB-8871	Ong et al (36)	Human samples	NanoString nCounter	Whole Blood	CoviD-19 (22, from 3 patients) / Healthy (10)		Normalized log2 count data was downloaded from ArrayExpress. T-test was used to compare infected vs healthy patients' CSF1 expression levels.
11	log2FC = 0.61 padj = 0.22	covid19cellatlas	Wilk et al (37)	Human samples	single cell RNA seq	Whole blood	CoviD-19 (7) / Healthy (8)		h5ad files were downloaded from https://www.covid19cellatlas.org. Gene counts from cells from the same patient were aggregated to obtain a unique expression profile. DEseq2 R library was used to compare infected vs healthy patients' gene expression profiles.
12	log2FC = 2.18 padj = 0.02	provided by authors	Ravindra et al (39)	In vitro infection	single cell RNA seq	NHBE cells	SARS-CoV-2 treated (3) / MOCK (1)		h5ed files have been kindly provided by authors. Gene counts from cells from the same patient were aggregated to obtain a unique expression profile for each patient. DEseq2 R library was used to compare infected vs healthy patients' gene expression profiles.
13	log2FC = 1.6 padj = 10^-7	provided by authors	Ravindra et al (39)	In vitro infection	single cell RNA seq	NHBE cells	infected (3) / bystanders (3)		h5ed files have been kindly provided by authors. Gene counts from ciliated cells from the same patient were aggregated to obtain a two expression profiles for each patient, i.e. the one related to infected cells and the one related to bystanders cells. DEseq2 R library was used to compare infected vs bystanders cells gene expression profiles, paired by their source (patients).
14	log2FC = 2.04 padj = 0.009	covid19cellatlas	Wyler et al (38)	In vitro infection	single cell RNA seq	Calu3 cells	SARS-CoV-2 treated (6) / MOCK (4)		h5ad files were downloaded from https://www.covid19cellatlas.org. Gene counts from cells from the same sample were aggregated to obtain a unique expression profile. DEseq2 R library was used to compare SARS-CoV-2 vs MOCK infected samples' gene expression profiles. DEseq2 R library was used to compare SARS-CoV-2 vs MOCK infected samples' gene expression profiles.
